# Supplementary material
Source: Springer Nature journal article supplement (https://www.springermedizin.de/resource/supplementary/13643_2012_50_MOESM8_ESM.pdf/9681370)
Supplement: MOESM8 [file 9681370]

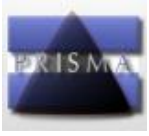

## PRISMA 2009 Flow Diagram

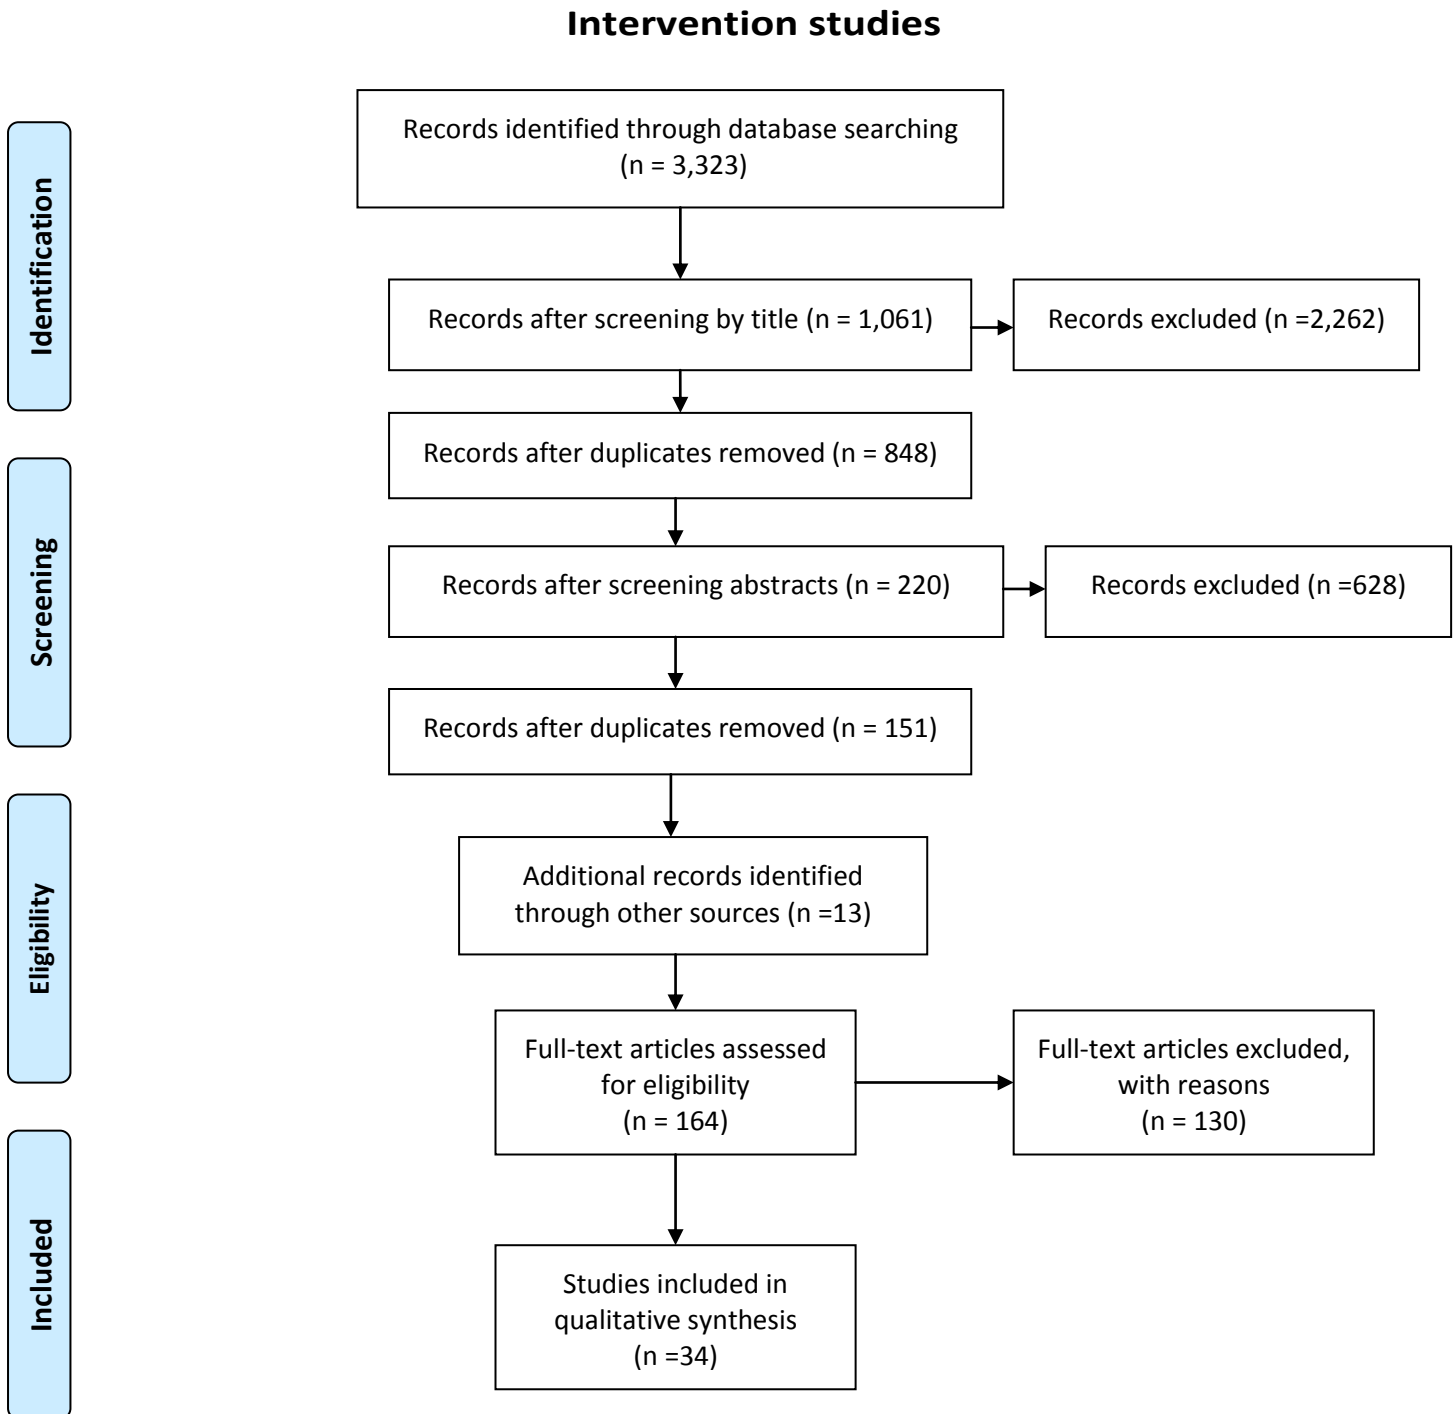

Adapted from Moher, D., et al., *Preferred reporting items for systematic reviews and meta-analyses: The PRISMA Statement*. PLoS Medicine, 2009. 6(7).

## Views studies

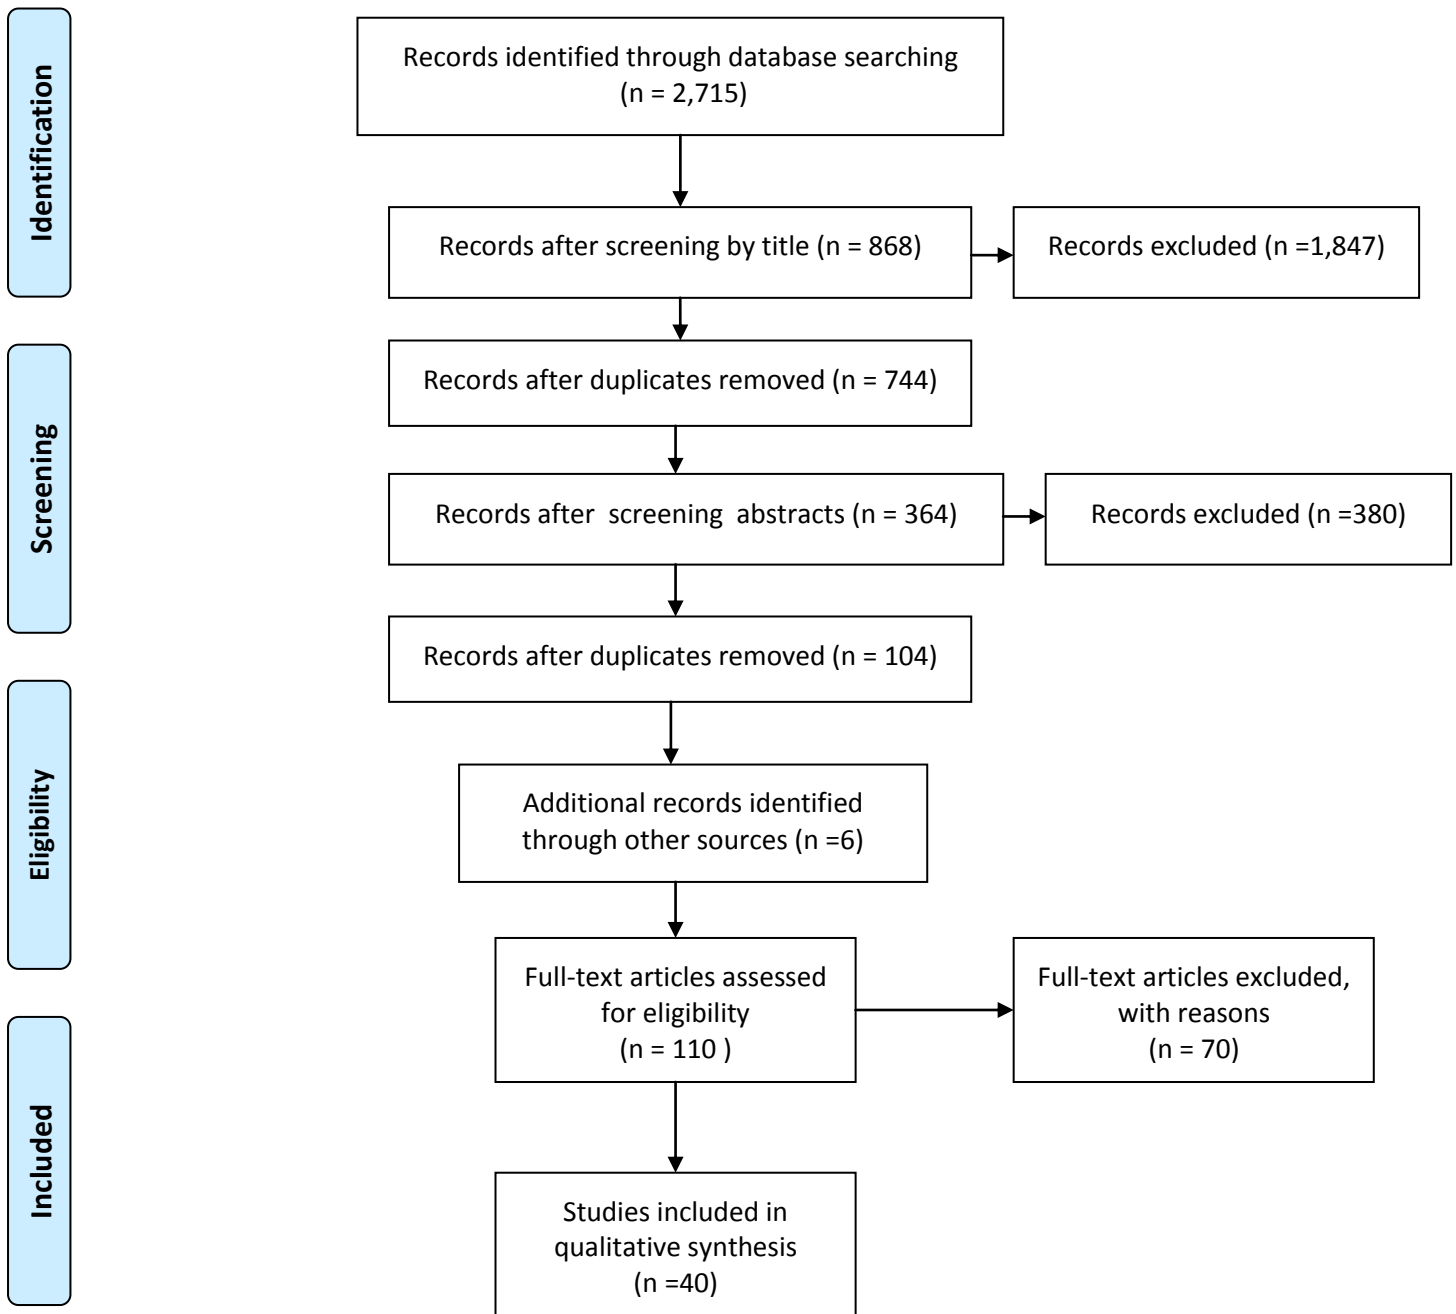

Adapted from Moher, D., et al., *Preferred reporting items for systematic reviews and meta-analyses: The PRISMA Statement*. PLoS Medicine, 2009. 6(7).
